# Supplementary material
Source: PubMed Central journal article supplement (PMC3438824)
Supplement: Supp_Data.pdf [file Supp_Data.pdf]

## Supplementary Data

SUPPLEMENTARY TABLE S1. DEMOGRAPHICS, CLINICAL CHARACTERISTICS, AND HARDY–WEINBERG EQUILIBRIUM OF THE GENOTYPES OF CYP27B1-1260 AND VDR TAQ I IN HEPATITIS B VIRUS PATIENTS, HEPATITIS B VIRUS INFECTION RESOLVERS, AND HEALTHY CONTROLS

|                             | <i>Patients</i> (n=274) | <i>Resolvers</i> (n=68) | <i>Controls</i> (n=158) | p     |
|-----------------------------|-------------------------|-------------------------|-------------------------|-------|
| Sex (male/female)           | 210/64                  | 43/25                   | 118/40                  | 0.076 |
| Age (year, mean±SD)         | 45.51±13.28             | 46.69±13.72             | 43.11±13.28             | 0.099 |
| HWE (observed vs. expected) |                         |                         |                         |       |
| CYP27B1-1260                |                         |                         |                         |       |
| <i>p</i> -value             | 0.984                   | 0.537                   | 0.644                   |       |
| VDR Taq I                   |                         |                         |                         |       |
| <i>p</i> -value             | 0.485                   | 1.000                   | 0.985                   |       |
| HBeAg status                |                         | —                       | —                       |       |
| HBeAg(+)                    | 112                     |                         |                         |       |
| HBeAg(-)                    | 162                     |                         |                         |       |
| Clinical diagnosis          |                         | —                       | —                       |       |
| Chronic hepatitis           | 94                      |                         |                         |       |
| Liver cirrhosis             | 90                      |                         |                         |       |
| HCC                         | 90                      |                         |                         |       |

HWE, Hardy–Weinberg equilibrium; HCC, hepatocellular carcinoma.
